# Supplementary material for: Metabolomic Profiling in Patients with Different Hemodynamic Subtypes of Severe Aortic Valve Stenosis
Source: MDPI journal article supplement (doi:10.3390/biom13010095), 2023-01-03
Supplement: s1 [file s1]

## **Supplementary Material**

### **Metabolomic profiling in patients with different hemodynamic subtypes of severe aortic valve stenosis**

**Philipp Bengel, Manar Elkenani, Bo E. Beuthner, Maik Pietzner, Belal A. Mohamed, Beatrix Pollok-Kopp, Ralph Krätzner, Karl Toischer, Miriam Puls, Andreas Fischer, Lutz Binder, Gerd Hasenfuß, Moritz Schnelle**

**Correspondence:** philipp.bengel@med.uni-goettingen.de & moritz.schnelle@med.uni-goettingen.de

**The file includes:**

**Supplementary Figure S1:** Nitrogen metabolites in AS and healthy controls

**Supplementary Figure S2:** Amino acids (AAs) metabolites in AS and healthy controls

**Supplementary Table S1:** Medical history

**Supplementary Table S2:** Pharmaceutical medication

Supplementary Figure S1.

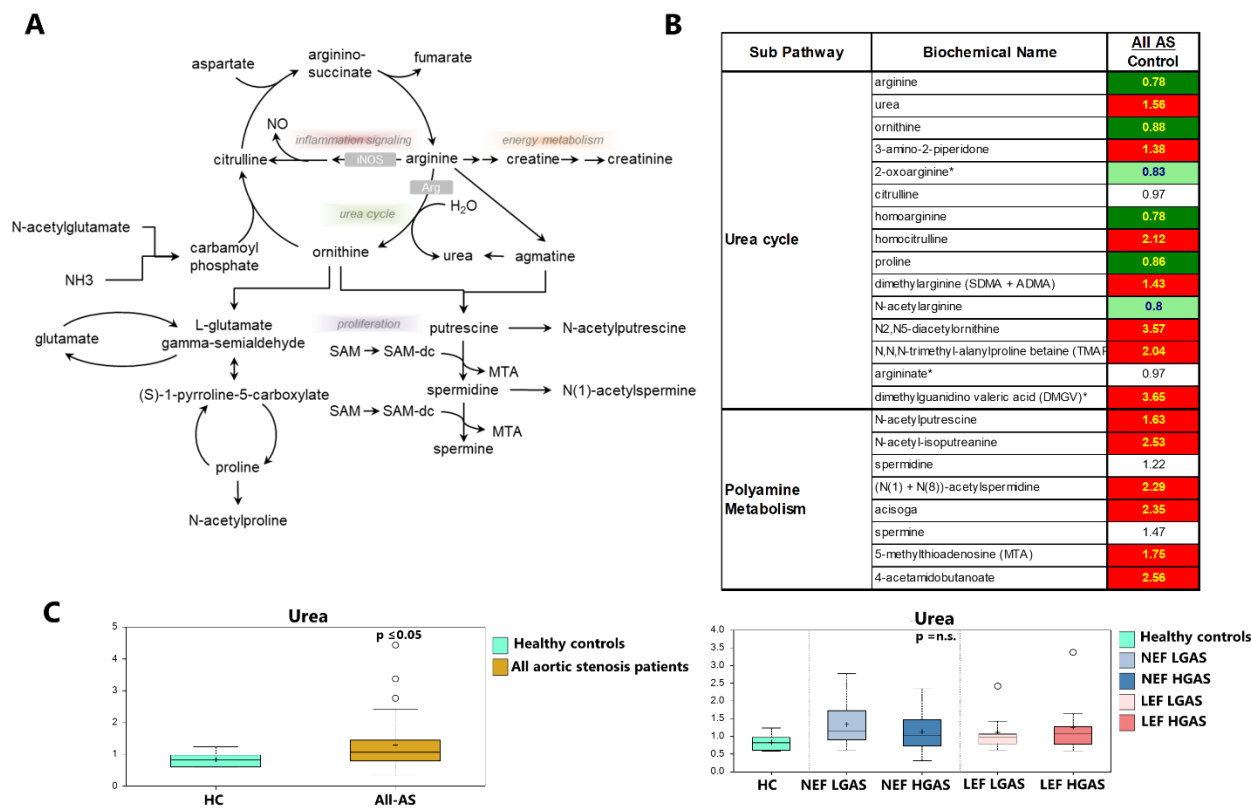

**Figure S1. Nitrogen metabolites in AS and healthy controls.** **A:** Schematic depicting the urea cycle and polyamine metabolic pathways. **B:** list of altered metabolites. Significantly up- and downregulated molecules are marked in red and green, respectively. Values marked in light green indicate a trend towards statistical significance ( $0.05 < p < 0.10$ ). Non-colored values are not significantly different for that comparison. Numbers indicate x-fold increase/decrease in concentration. **C:** Urea as an example between All-AS vs controls as well as the different AS subgroups. On each box, the black cross indicates the mean value, the borders and segmentation indicate limits of upper / lower quartile and median values. Outliers are plotted as circles. n.s.: not significant between AS subgroups.

Supplementary Figure S2.

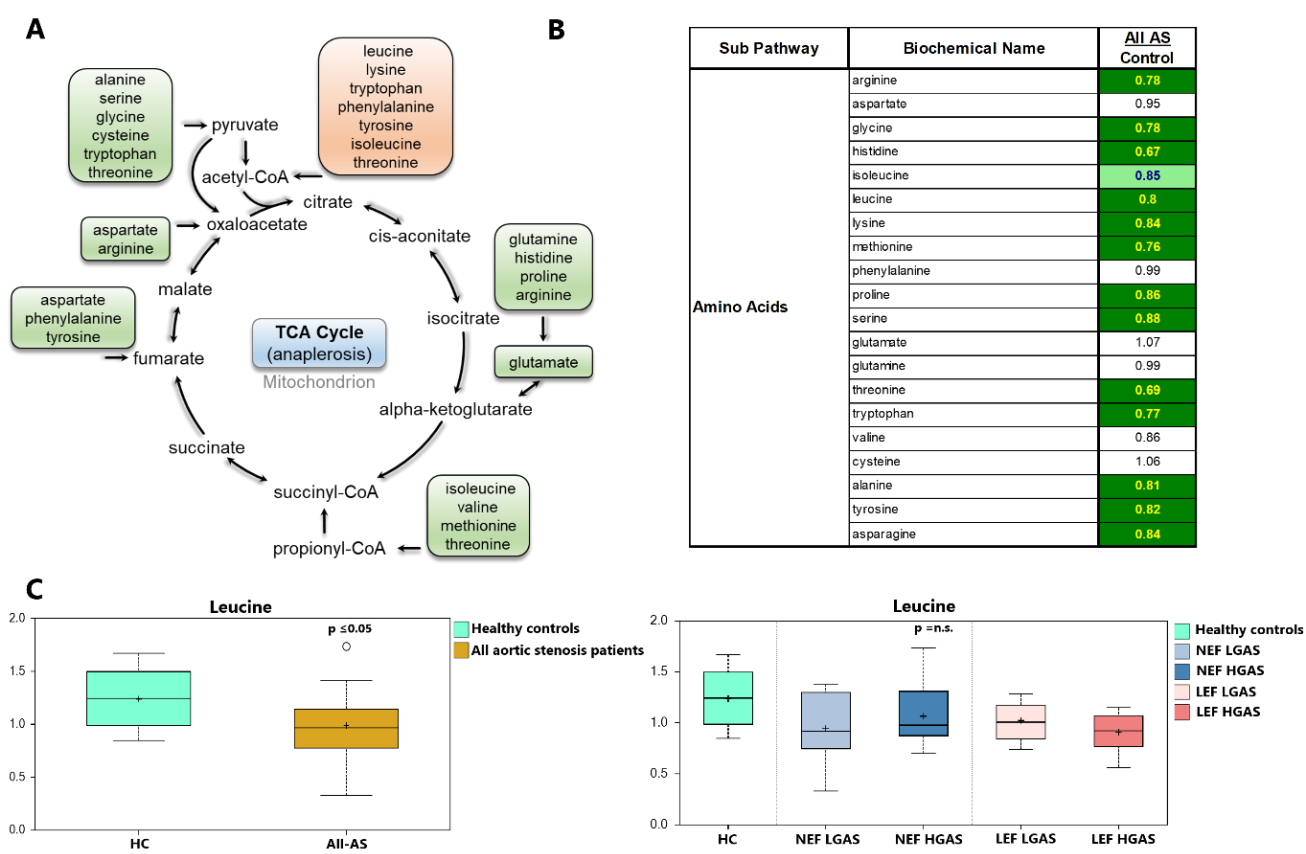

**Figure S2. Amino acids (AAs) metabolites in AS and healthy controls.** **A:** Illustration of AAs utilization pathways for energy production via TCA-cycle. **B:** list of altered metabolites. Significantly downregulated molecules are marked in green. Value marked in light green indicates a trend towards statistical significance ( $0.05 < p < 0.10$ ). Non-colored values are not significantly different for that comparison. Numbers indicate x-fold decrease in concentration. **C:** Leucine as an example between All-AS vs controls as well as the different AS subgroups. On each box, the black cross indicates the mean value the borders and segmentation indicate limits of upper / lower quartile and median values. Outliers are plotted as circles. n.s.: not significant between AS subgroups.

**Supplementary Table S1:****Table S1. Medical history.**

|                                                                | NEF HGAS  | LEF HGAS | LEF LGAS | NEF LGAS  |
|----------------------------------------------------------------|-----------|----------|----------|-----------|
| <b>Medical history, n (%)</b>                                  |           |          |          |           |
| Coronary artery disease                                        | 4 (40%)   | 5 (50%)  | 9 (90%)  | 7 (70%)   |
| Prior myocardial infarction                                    | 0 (0%)    | 0 (0%)   | 3 (30%)  | 1 (10%)   |
| Prior Stroke / TIA                                             | 1 (10%)   | 0 (0%)   | 1 (10%)  | 2 (20%)   |
| Peripheral artery disease                                      | 0 (0%)    | 1 (10%)  | 2 (20%)  | 0 (0%)    |
| Hypertension                                                   | 10 (100%) | 5 (50%)  | 9 (90%)  | 10 (100%) |
| Atrial fibrillation                                            | 1 (10%)   | 3 (30%)  | 6 (60%)  | 7 (70%)   |
| Chronic kidney disease<br>(GFR <60 ml/min/1,73m <sup>2</sup> ) | 7 (70%)   | 2 (20%)  | 6 (60%)  | 8 (80%)   |
| Hyperlipidemia                                                 | 8 (80%)   | 3 (30%)  | 3 (30%)  | 5 (50%)   |
| Diabetes mellitus                                              | 4 (40%)   | 3 (30%)  | 5 (50%)  | 5 (50%)   |

**Supplementary Table S2:**

**Table S2. Pharmaceutical medication.** ACE-Inhibitor: Angiotensin-converting enzyme inhibitors, AT1-Blocker: Angiotensin II receptor type 1 blockers, ARNI: Angiotensin receptor II blocker - neprilysin inhibitor, MRA: Mineralocorticoid receptor antagonists, VKA: Vitamin K antagonists, DOAC: Direct oral anticoagulants.

|                          | NEF HGAS | LEF HGAS | LEF LGAS | NEF LGAS |
|--------------------------|----------|----------|----------|----------|
| <b>Medication, n (%)</b> |          |          |          |          |
| ACE-Inhibitor            | 6 (60%)  | 4 (40%)  | 6 (60%)  | 6 (60%)  |
| AT1-Blocker              | 3 (30%)  | 2 (20%)  | 3 (30%)  | 3 (30%)  |
| ARNI                     | 0 (0%)   | 1 (10%)  | 0 (0%)   | 0 (0%)   |
| Beta-Blocker             | 7 (70%)  | 5 (50%)  | 5 (50%)  | 6 (60%)  |
| MRA                      | 2 (20%)  | 3 (30%)  | 1 (10%)  | 0 (0%)   |
| Loop Diuretics           | 4 (40%)  | 7 (70%)  | 7 (70%)  | 7 (70%)  |
| Thiazid Diuretics        | 4 (40%)  | 2 (20%)  | 2 (20%)  | 4 (40%)  |
| Statines                 | 5 (50%)  | 4 (40%)  | 3 (30%)  | 6 (60%)  |
| Ezetemibe                | 0 (0%)   | 0 (0%)   | 1 (10%)  | 0 (0%)   |
| VKA                      | 0 (0%)   | 2 (20%)  | 2 (20%)  | 3 (30%)  |
| DOAC                     | 1 (10%)  | 1 (10%)  | 1 (10%)  | 4 (40%)  |
| Insulin                  | 0 (0%)   | 1 (10%)  | 2 (20%)  | 3 (30%)  |
| Oral Antidiabetics       | 4 (40%)  | 2 (20%)  | 2 (20%)  | 2 (20%)  |
